# Supplementary material
Source: Springer Nature journal article supplement (https://www.springermedizin.de/resource/supplementary/12937_2011_436_MOESM5_ESM.pdf/25653108)
Supplement: MOESM5 [file 25653108]

### Ghrelin kinetics after Solid Meal

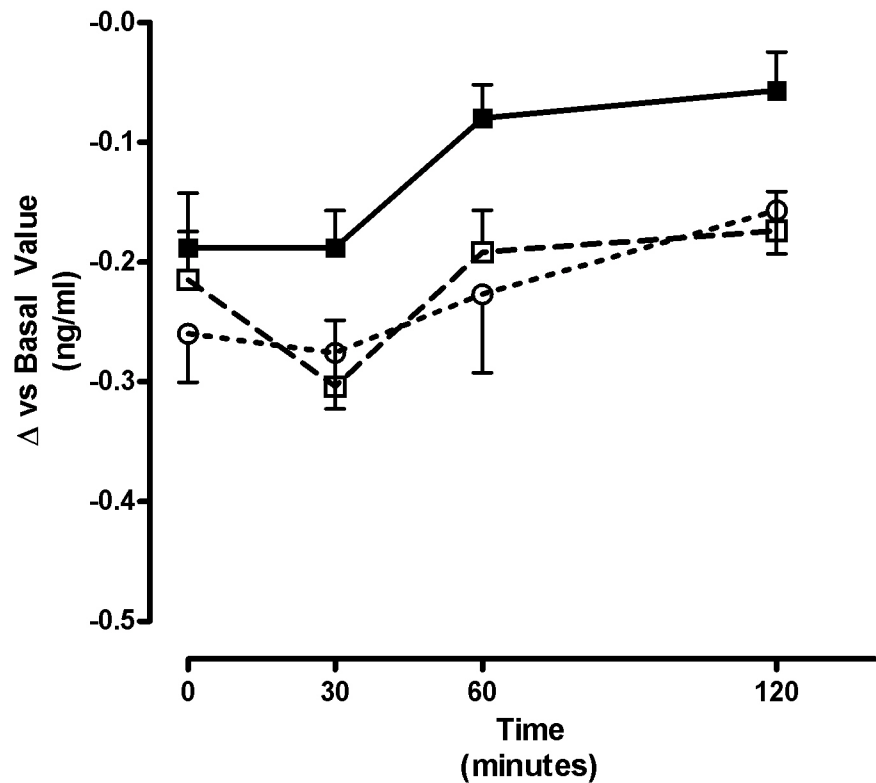

### Ghrelin kinetics after Liquid Meal

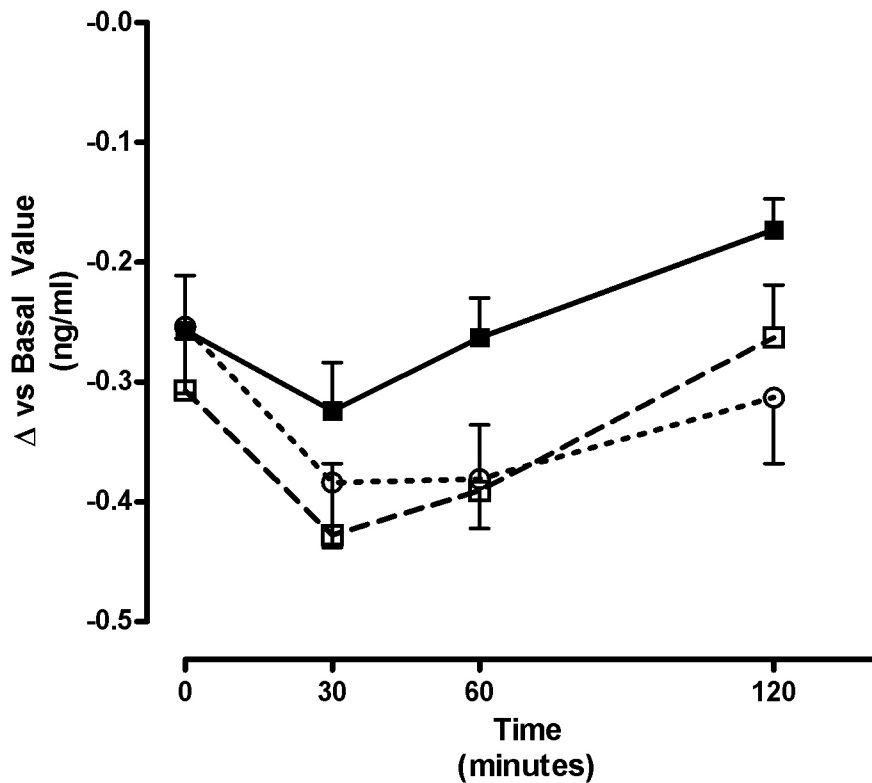

○ Water    ■ B -CO<sub>2</sub>    □ B +CO<sub>2</sub>
